# Supplementary material for: Low-dose 7,8-Dihydroxyflavone Administration After Status Epilepticus Prevents Epilepsy Development
Source: PubMed Central journal article supplement (PMC9723075; doi:10.1007/s13311-022-01299-4), 2022-09-30
Supplement: 13311_2022_1299_MOESM3_ESM.pdf [file 13311_2022_1299_MOESM3_ESM.pdf]

# Low-dose 7,8-Dihydroxyflavone Administration after Status Epilepticus Prevents Epilepsy Development

Annunziata Guarino,<sup>1\*</sup> Barbara Bettegazzi,<sup>2\*</sup> Nimra Aziz,<sup>1</sup> Mario Barbieri,<sup>1</sup>  
Daniela Bochicchio,<sup>1</sup> Lucia Crippa,<sup>2</sup> Pietro Marino,<sup>1</sup> Maddalena Sguizzato,<sup>1</sup>  
Marie Soukupova,<sup>1</sup> Silvia Zucchini,<sup>1,3</sup> Michele Simonato<sup>1,4</sup>

<sup>1</sup> Department of Neuroscience and Rehabilitation, University of Ferrara, via Fossato di Mortara 70, 44121 Ferrara, Italy

<sup>2</sup> University Vita-Salute San Raffaele, via Olgettina 58, 20132 Milan, Italy

<sup>3</sup> Laboratory of Technologies for Advanced Therapy (LTTA), Technopole of Ferrara, Ferrara, Italy

<sup>4</sup> Division of Neuroscience, IRCCS San Raffaele Hospital, via Olgettina 60, 20132 Milan, Italy

\* These authors contributed equally to this work.

## Address correspondence to

Silvia Zucchini

Department of Neuroscience and Rehabilitation

University of Ferrara

via Fossato di Mortara 70

44121 Ferrara

Italy

Email: [silvia.zucchini@unife.it](mailto:silvia.zucchini@unife.it)

**Supplementary Table 1.** Antibodies employed in Western Blot.

| <b>Antibody</b>                | <b>Product no.</b> | <b>Concentration</b> | <b>Blocking</b> | <b>Producer</b>           |
|--------------------------------|--------------------|----------------------|-----------------|---------------------------|
| S473-AKT                       | 4060               | 1:1000               | 5% BSA in TBST  | Cell Signaling Technology |
| AKT                            | 4691               | 1:5000               | 5% BSA in TBST  | Cell Signaling Technology |
| Phospho-ERK                    | 4370               | 1:1000               | 5% BSA in TBST  | Cell Signaling Technology |
| ERK                            | 9102               | 1:1000               | 5% BSA in TBST  | Cell Signaling Technology |
| alpha Tubulin                  | T9026              | 1:6000               | 5% Milk in TBST | Merck                     |
| GAPDH (14C10)                  | 2118               | 1:1000               | 5% Milk in TBST | Cell Signaling Technology |
| PLC $\gamma$                   | 5690               | 1:1000               | 5% BSA in TBST  | Cell Signaling Technology |
| Phospho-PLC $\gamma$<br>Tyr783 | 2821               | 1:1000               | 5% BSA in TBST  | Cell Signaling Technology |
| TrkB                           | 4603               | 1:1000               | 5% BSA in TBST  | Cell Signaling Technology |
| TrkB Y816                      | ABN1381            | 1:1000               | 5% Milk in TBST | Merck                     |
| TrkB Y515                      | LS-C336054-50      | 1:1000               | 5% Milk in TBST | LSBio                     |

## Supplementary Table 2. Statistical information.

Figures 1-4

|                  | Experiment                   | Outcome measures         | Time point            | Test                              | Treatment                         | Mean Diff                         | 95,00% CI of diff  | Below threshold | Summary         | Adjusted P Value |        |        |
|------------------|------------------------------|--------------------------|-----------------------|-----------------------------------|-----------------------------------|-----------------------------------|--------------------|-----------------|-----------------|------------------|--------|--------|
| Seizures         | Mean behavioural Seizure/day |                          | 1-21 dpSE             | Tukey's multiple comparisons test | vehicle vs. DHF 5                 | 0.1223                            | 0,02821 to 0,2164  | Yes             | **              | 0.008            |        |        |
|                  |                              |                          |                       |                                   | vehicle vs. DHF 10                | -0.07523                          | -0,1736 to 0,02319 | No              | ns              | 0.1646           |        |        |
|                  |                              |                          |                       |                                   | DHF 5 vs. DHF 10                  | -0.1975                           | -0,2933 to -0,1018 | Yes             | ****            | <0,0001          |        |        |
|                  | Mean EEG Seizure/day         |                          | 1-21 dpSE             | Tukey's multiple comparisons test | vehicle vs. DHF 5                 | 0.3194                            | 0,04204 to 0,5968  | Yes             | *               | 0.0248           |        |        |
|                  |                              |                          |                       |                                   | vehicle vs. DHF 10                | -0.05833                          | -0,3357 to 0,2191  | No              | ns              | 0.8395           |        |        |
|                  |                              |                          |                       |                                   | DHF 5 vs. DHF 10                  | -0.3778                           | -0,6393 to -0,1162 | Yes             | **              | 0.0064           |        |        |
| Behavioral Tests | Open field                   | total distance travelled | baseline              | Tukey's multiple comparisons test | veh vs. DHF 5                     | 2.853                             | -7,417 to 13,12    | No              | ns              | 0.7695           |        |        |
|                  |                              |                          |                       |                                   | veh vs. DHF 10                    | -1.362                            | -10,58 to 7,860    | No              | ns              | 0.9272           |        |        |
|                  |                              |                          |                       |                                   | DHF 5 vs. DHF 10                  | -4.215                            | -15,42 to 6,989    | No              | ns              | 0.6224           |        |        |
|                  |                              |                          | early phase           | Tukey's multiple comparisons test | veh vs. DHF 5                     | 5.891                             | -18,00 to 29,78    | No              | ns              | 0.8124           |        |        |
|                  |                              |                          |                       |                                   | veh vs. DHF 10                    | 9.517                             | -17,32 to 36,36    | No              | ns              | 0.6556           |        |        |
|                  |                              |                          |                       |                                   | DHF 5 vs. DHF 10                  | 3.626                             | -18,22 to 25,48    | No              | ns              | 0.9083           |        |        |
|                  |                              |                          | late phase            | Tukey's multiple comparisons test | veh vs. DHF 5                     | 27.25                             | 7,738 to 46,77     | Yes             | **              | 0.0051           |        |        |
|                  |                              |                          |                       |                                   | veh vs. DHF 10                    | 11.82                             | -14,03 to 37,67    | No              | ns              | 0.4958           |        |        |
|                  |                              |                          |                       |                                   | DHF 5 vs. DHF 10                  | -15.43                            | -39,15 to 8,286    | No              | ns              | 0.2466           |        |        |
|                  |                              |                          | Time immobile         | baseline                          | Tukey's multiple comparisons test | veh vs. DHF 5                     | -4.873             | -72,35 to 62,60 | No              | ns               | 0.9824 |        |
|                  |                              |                          |                       |                                   |                                   | veh vs. DHF 10                    | 15.13              | -51,83 to 82,08 | No              | ns               | 0.8405 |        |
|                  |                              |                          |                       |                                   |                                   | DHF 5 vs. DHF 10                  | 20                 | -37,57 to 77,56 | No              | ns               | 0.6664 |        |
|                  |                              | early phase              |                       | Tukey's multiple comparisons test | veh vs. DHF 5                     | -3.733                            | -51,64 to 44,18    | No              | ns              | 0.9789           |        |        |
|                  |                              |                          |                       |                                   | veh vs. DHF 10                    | 4.8                               | -56,24 to 65,84    | No              | ns              | 0.979            |        |        |
|                  |                              |                          |                       |                                   | DHF 5 vs. DHF 10                  | 8.533                             | -41,51 to 58,58    | No              | ns              | 0.8992           |        |        |
|                  |                              | late phase               |                       | Tukey's multiple comparisons test | veh vs. DHF 5                     | -64.13                            | -119,3 to -8,921   | Yes             | *               | 0.0203           |        |        |
|                  |                              |                          |                       |                                   | veh vs. DHF 10                    | -22.31                            | -114,6 to 69,97    | No              | ns              | 0.8101           |        |        |
|                  |                              |                          |                       |                                   | DHF 5 vs. DHF 10                  | 41.82                             | -49,99 to 133,6    | No              | ns              | 0.4842           |        |        |
|                  |                              | distance in the center   |                       | baseline                          | Tukey's multiple comparisons test | veh vs. DHF 5                     | -0.3787            | -3,751 to 2,994 | No              | ns               | 0.9584 |        |
|                  |                              |                          |                       |                                   |                                   | veh vs. DHF 10                    | -0.496             | -3,897 to 2,905 | No              | ns               | 0.9298 |        |
|                  |                              |                          |                       |                                   |                                   | DHF 5 vs. DHF 10                  | -0.1174            | -3,584 to 3,349 | No              | ns               | 0.9961 |        |
|                  |                              |                          | early phase           | Tukey's multiple comparisons test | veh vs. DHF 5                     | 5.043                             | -2,924 to 13,01    | No              | ns              | 0.2687           |        |        |
|                  |                              |                          |                       |                                   | veh vs. DHF 10                    | 1.676                             | -8,363 to 11,72    | No              | ns              | 0.9092           |        |        |
|                  |                              |                          |                       |                                   | DHF 5 vs. DHF 10                  | -3.366                            | -11,57 to 4,842    | No              | ns              | 0.5528           |        |        |
|                  |                              |                          | late phase            | Tukey's multiple comparisons test | veh vs. DHF 5                     | 5.21                              | -3,383 to 13,80    | No              | ns              | 0.2931           |        |        |
|                  |                              |                          |                       |                                   | veh vs. DHF 10                    | -0.34                             | -10,49 to 9,813    | No              | ns              | 0.9962           |        |        |
|                  |                              |                          |                       |                                   | DHF 5 vs. DHF 10                  | -5.55                             | -12,90 to 1,804    | No              | ns              | 0.1573           |        |        |
|                  |                              |                          | entries in the center | baseline                          | Tukey's multiple comparisons test | veh vs. DHF 5                     | 0.4                | -10,51 to 11,31 | No              | ns               | 0.9955 |        |
|                  |                              |                          |                       |                                   |                                   | veh vs. DHF 10                    | -1.333             | -12,68 to 10,01 | No              | ns               | 0.9538 |        |
|                  |                              |                          |                       |                                   |                                   | DHF 5 vs. DHF 10                  | -1.733             | -12,90 to 9,433 | No              | ns               | 0.9208 |        |
|                  |                              | early phase              |                       | Tukey's multiple comparisons test | veh vs. DHF 5                     | 12.13                             | -8,894 to 33,16    | No              | ns              | 0.3355           |        |        |
|                  |                              |                          |                       |                                   | veh vs. DHF 10                    | 0.5667                            | -27,71 to 28,84    | No              | ns              | 0.9986           |        |        |
|                  |                              |                          |                       |                                   | DHF 5 vs. DHF 10                  | -11.57                            | -36,67 to 13,54    | No              | ns              | 0.4778           |        |        |
|                  |                              | late phase               |                       | Tukey's multiple comparisons test | veh vs. DHF 5                     | 17.8                              | -5,071 to 40,67    | No              | ns              | 0.1459           |        |        |
|                  |                              |                          |                       |                                   | veh vs. DHF 10                    | 0.8667                            | -26,75 to 28,49    | No              | ns              | 0.9966           |        |        |
|                  |                              |                          |                       |                                   | DHF 5 vs. DHF 10                  | -16.93                            | -38,59 to 4,726    | No              | ns              | 0.1408           |        |        |
|                  |                              | Elevated plus maze       |                       | Time open arms                    | baseline                          | Tukey's multiple comparisons test | veh vs. DHF 5      | 1.867           | -51,89 to 55,62 | No               | ns     | 0.9963 |
|                  |                              |                          |                       |                                   |                                   |                                   | veh vs. DHF 10     | -0.3333         | -57,24 to 56,57 | No               | ns     | 0.9999 |
|                  |                              |                          |                       |                                   |                                   |                                   | DHF 5 vs. DHF 10   | -2.2            | -58,22 to 53,82 | No               | ns     | 0.9952 |
|                  |                              |                          | early phase           | Tukey's multiple comparisons test | veh vs. DHF 5                     | -3.505                            | -57,26 to 50,25    | No              | ns              | 0.9869           |        |        |
|                  |                              |                          |                       |                                   | veh vs. DHF 10                    | -22.07                            | -78,98 to 34,83    | No              | ns              | 0.6281           |        |        |
|                  |                              |                          |                       |                                   | DHF 5 vs. DHF 10                  | -18.57                            | -74,59 to 37,46    | No              | ns              | 0.7117           |        |        |
|                  |                              |                          | late phase            | Tukey's multiple comparisons test | veh vs. DHF 5                     | 1.419                             | -52,33 to 55,17    | No              | ns              | 0.9978           |        |        |

|                  |                                  |                                  |                  |                      |                                   |                                   |                                  |                  |                   |        |         |        |         |
|------------------|----------------------------------|----------------------------------|------------------|----------------------|-----------------------------------|-----------------------------------|----------------------------------|------------------|-------------------|--------|---------|--------|---------|
|                  |                                  |                                  |                  | comparisons test     | veh vs. DHF 10                    | -6.798                            | -63,70 to 50,11                  | No               | ns                | 0.9566 |         |        |         |
|                  |                                  |                                  |                  |                      | DHF 5 vs. DHF 10                  | -8.217                            | -64,24 to 47,81                  | No               | ns                | 0.9354 |         |        |         |
|                  |                                  |                                  |                  | Time closed arms     | baseline                          | Tukey's multiple comparisons test | veh vs. DHF 5                    | -2.719           | -64,29 to 58,85   | No     | ns      | 0.994  |         |
|                  |                                  |                                  |                  |                      |                                   |                                   | veh vs. DHF 10                   | 6.131            | -59,05 to 71,31   | No     | ns      | 0.9729 |         |
|                  |                                  |                                  |                  |                      |                                   |                                   | DHF 5 vs. DHF 10                 | 8.85             | -55,32 to 73,02   | No     | ns      | 0.9426 |         |
|                  |                                  |                                  |                  |                      | early phase                       | Tukey's multiple comparisons test | veh vs. DHF 5                    | 29.9             | -31,67 to 91,47   | No     | ns      | 0.4835 |         |
|                  |                                  |                                  |                  |                      |                                   |                                   | veh vs. DHF 10                   | 16.33            | -48,84 to 81,51   | No     | ns      | 0.823  |         |
|                  |                                  |                                  |                  |                      |                                   |                                   | DHF 5 vs. DHF 10                 | -13.57           | -77,73 to 50,60   | No     | ns      | 0.8705 |         |
|                  |                                  |                                  |                  | late phase           | Tukey's multiple comparisons test | veh vs. DHF 5                     | -15.57                           | -77,13 to 46,00  | No                | ns     | 0.8202  |        |         |
|                  |                                  |                                  |                  |                      |                                   | veh vs. DHF 10                    | -35.58                           | -100,8 to 29,59  | No                | ns     | 0.4001  |        |         |
|                  |                                  |                                  |                  |                      |                                   | DHF 5 vs. DHF 10                  | -20.02                           | -84,18 to 44,15  | No                | ns     | 0.7398  |        |         |
|                  |                                  |                                  |                  | Entries open arms    | baseline                          | Tukey's multiple comparisons test | veh vs. DHF 5                    | 0.2619           | -3,968 to 4,492   | No     | ns      |        |         |
|                  |                                  |                                  |                  |                      |                                   |                                   | veh vs. DHF 10                   | 0.4286           | -4,049 to 4,906   | No     | ns      | 0.9719 |         |
|                  |                                  |                                  |                  |                      |                                   |                                   | DHF 5 vs. DHF 10                 | 0.1667           | -4,242 to 4,575   | No     | ns      | 0.9956 |         |
|                  |                                  |                                  |                  |                      | early phase                       | Tukey's multiple comparisons test | veh vs. DHF 5                    | -0.1667          | -4,397 to 4,063   | No     | ns      | 0.9952 |         |
|                  |                                  |                                  |                  |                      |                                   |                                   | veh vs. DHF 10                   | -2.167           | -6,645 to 2,311   | No     | ns      | 0.4861 |         |
|                  |                                  |                                  |                  |                      |                                   |                                   | DHF 5 vs. DHF 10                 | -2               | -6,408 to 2,408   | No     | ns      | 0.53   |         |
|                  |                                  |                                  |                  |                      | late phase                        | Tukey's multiple comparisons test | veh vs. DHF 5                    | -0.1619          | -4,392 to 4,068   | No     | ns      | 0.9955 |         |
|                  |                                  |                                  |                  |                      |                                   |                                   | veh vs. DHF 10                   | 0.5714           | -3,906 to 5,049   | No     | ns      | 0.9507 |         |
|                  |                                  |                                  |                  |                      |                                   |                                   | DHF 5 vs. DHF 10                 | 0.7333           | -3,675 to 5,142   | No     | ns      | 0.9176 |         |
|                  |                                  |                                  |                  |                      |                                   |                                   | veh vs. DHF 5                    | -2.057           | -6,662 to 2,548   | No     | ns      | 0.5172 |         |
|                  |                                  |                                  |                  |                      |                                   |                                   | veh vs. DHF 10                   | 0.2262           | -4,047 to 4,500   | No     | ns      | 0.9904 |         |
|                  |                                  |                                  |                  |                      |                                   |                                   | DHF 5 vs. DHF 10                 | 2.283            | -1,717 to 6,283   | No     | ns      | 0.345  |         |
|                  |                                  |                                  |                  | Entries closed arms  | early phase                       | Tukey's multiple comparisons test | veh vs. DHF 5                    | -2.233           | -5,538 to 1,071   | No     | ns      | 0.2319 |         |
|                  |                                  |                                  |                  |                      |                                   |                                   | veh vs. DHF 10                   | -3.667           | -7,344 to 0,01116 | No     | ns      | 0.0508 |         |
|                  |                                  |                                  |                  |                      |                                   |                                   | DHF 5 vs. DHF 10                 | -1.433           | -4,865 to 1,996   | No     | ns      | 0.5554 |         |
|                  |                                  |                                  |                  |                      | late phase                        | Tukey's multiple comparisons test | veh vs. DHF 5                    | -0.2571          | -5,928 to 5,413   | No     | ns      | 0.9931 |         |
|                  |                                  |                                  |                  |                      |                                   |                                   | veh vs. DHF 10                   | 2.643            | -3,625 to 8,910   | No     | ns      | 0.5501 |         |
|                  |                                  |                                  |                  |                      |                                   |                                   | DHF 5 vs. DHF 10                 | 2.9              | -3,255 to 9,055   | No     | ns      | 0.4767 |         |
|                  |                                  |                                  |                  | Object location task |                                   |                                   | Fisher's exact test              |                  |                   | Yes    | *       | 0.0253 |         |
|                  |                                  |                                  |                  | Histology            | GFAP                              | CA1                               | Dunn's multiple comparisons test | veh vs. Naive    | 8.714             |        | No      | ns     | 0.1981  |
|                  |                                  |                                  |                  |                      |                                   |                                   |                                  | DHF 5 vs. Naive  | 3.643             |        | No      | ns     | >0,9999 |
|                  |                                  |                                  |                  |                      |                                   |                                   |                                  | DHF 10 vs. Naive | 10.93             |        | No      | ns     | 0.088   |
|                  |                                  |                                  |                  |                      |                                   |                                   |                                  | DHF 5 vs. veh    | -5.071            |        | No      | ns     | >0,9999 |
|                  |                                  |                                  |                  |                      |                                   |                                   |                                  | DHF 10 vs. veh   | 2.214             |        | No      | ns     | >0,9999 |
|                  |                                  |                                  |                  |                      |                                   |                                   |                                  | DHF 10 vs. DHF 5 | 7.286             |        | No      | ns     | 0.6223  |
|                  |                                  |                                  |                  |                      |                                   |                                   |                                  | veh vs. Naive    | 12.29             |        | Yes     | *      | 0.0159  |
|                  |                                  |                                  |                  |                      |                                   |                                   |                                  | DHF 5 vs. Naive  | 5.214             |        | No      | ns     | >0,9999 |
|                  |                                  |                                  |                  |                      |                                   |                                   |                                  | DHF 10 vs. Naive | 11.9              |        | Yes     | *      | 0.0472  |
|                  |                                  |                                  |                  |                      |                                   |                                   |                                  | DHF 5 vs. veh    | -7.071            |        | No      | ns     | 0.5018  |
|                  |                                  |                                  |                  |                      |                                   |                                   |                                  | DHF 10 vs. veh   | -0.3857           |        | No      | ns     | >0,9999 |
|                  |                                  |                                  |                  |                      |                                   |                                   |                                  | DHF 10 vs. DHF 5 | 6.686             |        | No      | ns     | 0.8125  |
|                  |                                  |                                  |                  |                      |                                   | CA3                               | Dunn's multiple comparisons test | veh vs. Naive    | 8.143             |        | No      | ns     | 0.2782  |
|                  |                                  |                                  |                  |                      |                                   |                                   |                                  | DHF 5 vs. Naive  | 3.214             |        | No      | ns     | >0,9999 |
|                  |                                  |                                  |                  |                      |                                   |                                   |                                  | DHF 10 vs. Naive | 10.84             |        | No      | ns     | 0.0927  |
|                  |                                  |                                  |                  |                      |                                   |                                   |                                  | DHF 5 vs. veh    | -4.929            |        | No      | ns     | >0,9999 |
|                  |                                  |                                  |                  |                      |                                   |                                   |                                  | DHF 10 vs. veh   | 2.7               |        | No      | ns     | >0,9999 |
|                  |                                  |                                  |                  |                      |                                   |                                   |                                  | DHF 10 vs. DHF 5 | 7.629             |        | No      | ns     | 0.5307  |
|                  |                                  |                                  |                  |                      |                                   | DG                                | Dunn's multiple comparisons test | veh vs. Naive    | -9.221            |        | No      | ns     | 0.5664  |
|                  |                                  |                                  |                  |                      |                                   |                                   |                                  | DHF 5 vs. Naive  | 1.643             |        | No      | ns     | >0,9999 |
| DHF 10 vs. Naive | -3.302                           |                                  | No               |                      |                                   |                                   |                                  | ns               | >0,9999           |        |         |        |         |
| DHF 5 vs. veh    | 10.86                            |                                  | No               |                      |                                   |                                   |                                  | ns               | 0.1347            |        |         |        |         |
| DHF 10 vs. veh   | 5.919                            |                                  | No               |                      |                                   |                                   |                                  | ns               | >0,9999           |        |         |        |         |
| CA1              | Dunn's multiple comparisons test | veh vs. Naive                    | -9.221           |                      |                                   |                                   |                                  |                  | No                | ns     | 0.5664  |        |         |
|                  |                                  | DHF 5 vs. Naive                  | 1.643            |                      |                                   |                                   |                                  |                  | No                | ns     | >0,9999 |        |         |
|                  |                                  | DHF 10 vs. Naive                 | -3.302           |                      |                                   |                                   |                                  |                  | No                | ns     | >0,9999 |        |         |
|                  |                                  | DHF 5 vs. veh                    | 10.86            |                      |                                   |                                   |                                  |                  | No                | ns     | 0.1347  |        |         |
|                  |                                  | DHF 10 vs. veh                   | 5.919            |                      | No                                | ns                                | >0,9999                          |                  |                   |        |         |        |         |
|                  |                                  | DHF 10 vs. DHF 5                 | 7.629            |                      | No                                | ns                                | 0.5307                           |                  |                   |        |         |        |         |
| NeuN             | CA1                              | Dunn's multiple comparisons test | veh vs. Naive    | -9.221               |                                   | No                                | ns                               | 0.5664           |                   |        |         |        |         |
|                  |                                  |                                  | DHF 5 vs. Naive  | 1.643                |                                   | No                                | ns                               | >0,9999          |                   |        |         |        |         |
|                  |                                  |                                  | DHF 10 vs. Naive | -3.302               |                                   | No                                | ns                               | >0,9999          |                   |        |         |        |         |
|                  |                                  |                                  | DHF 5 vs. veh    | 10.86                |                                   | No                                | ns                               | 0.1347           |                   |        |         |        |         |
|                  |                                  |                                  | DHF 10 vs. veh   | 5.919                |                                   | No                                | ns                               | >0,9999          |                   |        |         |        |         |
|                  |                                  |                                  | DHF 10 vs. DHF 5 | 7.629                |                                   | No                                | ns                               | 0.5307           |                   |        |         |        |         |

|  |  |     |                                  |                  |        |  |     |     |         |
|--|--|-----|----------------------------------|------------------|--------|--|-----|-----|---------|
|  |  |     |                                  | DHF 10 vs. DHF 5 | -4.944 |  | No  | ns  | >0.9999 |
|  |  | CA3 | Dunn's multiple comparisons test | veh vs. Naive    | -19.4  |  | Yes | **  | 0.0026  |
|  |  |     |                                  | DHF 5 vs. Naive  | -5.524 |  | No  | ns  | >0.9999 |
|  |  |     |                                  | DHF 10 vs. Naive | -11.63 |  | No  | ns  | 0.2573  |
|  |  |     |                                  | DHF 5 vs. veh    | 13.88  |  | Yes | *   | 0.0213  |
|  |  |     |                                  | DHF 10 vs. veh   | 7.768  |  | No  | ns  | 0.7775  |
|  |  |     |                                  | DHF 10 vs. DHF 5 | -6.111 |  | No  | ns  | >0.9999 |
|  |  | DG  | Dunn's multiple comparisons test | veh vs. Naive    | -23.43 |  | Yes | *** | 0.0002  |
|  |  |     |                                  | DHF 5 vs. Naive  | -14.35 |  | No  | ns  | 0.0529  |
|  |  |     |                                  | DHF 10 vs. Naive | -21.43 |  | Yes | **  | 0.0017  |
|  |  |     |                                  | DHF 5 vs. veh    | 9.077  |  | No  | ns  | 0.3483  |
|  |  |     |                                  | DHF 10 vs. veh   | 2      |  | No  | ns  | >0.9999 |
|  |  |     |                                  | DHF 10 vs. DHF 5 | -7.077 |  | No  | ns  | 0.9761  |

Figure 5

|           |              | Mean   | S. E. M | C. I           | P      | Adjusted P value         |
|-----------|--------------|--------|---------|----------------|--------|--------------------------|
| pPLC      | naive        | 1      | 0.1994  | 0.5120, 1.488  | 0.0177 | naive vs. 5mg/Kg >0.9999 |
|           | DHF 5mg/Kg   | 0.8350 | 0.2511  | 0.2206, 1.449  |        | naive vs. 10mg/Kg 0.0429 |
|           | DHF 10 mg/kg | 1.941  | 0.2594  | 1.275, 2.608   |        |                          |
| pERK      | naive        | 1      | 0.2299  | 0.4374, 1.563  | 0.0157 | naive vs. 5mg/Kg 0.0250  |
|           | DHF 5mg/Kg   | 17.72  | 7.172   | 0.1672, 35.27  |        | naive vs. 10mg/Kg 0.0449 |
|           | DHF 10 mg/kg | 11.72  | 4.032   | 1.857, 21.59   |        |                          |
| pAKT      | naive        | 1      | 0.5507  | -0.3476, 2.348 | 0.0068 | naive vs. 5mg/Kg 0.0172  |
|           | DHF 5mg/Kg   | 8.350  | 2.795   | 1.512, 15.19   |        | naive vs. 10mg/Kg 0.0221 |
|           | DHF 10 mg/kg | 7.962  | 2.481   | 1.890, 14.03   |        |                          |
| Y515 TrkB | naive        | 1      | 0.1691  | 0.5653, 1.435  | 0.0091 | naive vs. 5mg/Kg 0.0227  |
|           | DHF 5mg/Kg   | 4.084  | 0.9722  | 1.705, 6.462   |        | naive vs. 10mg/Kg 0.0239 |
|           | DHF 10 mg/kg | 4.469  | 1.442   | 0.7615, 8.176  |        |                          |
| Y816 TrkB | naive        | 1      | 0.02981 | 0.9234, 1.077  | 0.0113 | naive vs. 5mg/Kg >0.9999 |
|           | DHF 5mg/Kg   | 0.9797 | 0.1202  | 0.6856, 1.274  |        | naive vs. 10mg/Kg 0.0389 |
|           | DHF 10 mg/kg | 3.217  | 1.114   | 0.3542, 6.079  |        |                          |

Figure 6

|      |              | Mean  | S. E. M | C. I          | P      | Adjusted P value          |
|------|--------------|-------|---------|---------------|--------|---------------------------|
| pPLC | naive        | 1     | 0.1142  | 0.7366, 1.263 | 0.8931 | naive vs. 5mg/Kg >0.9999  |
|      | DHF 5mg/Kg   | 1.348 | 0.3170  | 0.6174, 2.079 |        | naive vs. 10mg/Kg >0.9999 |
|      | DHF 10 mg/kg | 1.339 | 0.3179  | 0.5878, 2.091 |        |                           |

|      |                 |       |        |                  |        |                             |
|------|-----------------|-------|--------|------------------|--------|-----------------------------|
| pAKT | naive           | 1     | 0.1527 | 0.6584,<br>1.362 | 0.2724 | naive vs. 5mg/Kg 0.2247     |
|      | DHF<br>5mg/Kg   | 3.169 | 1.147  | 0.3618,<br>5.975 |        | naive vs. 10mg/Kg<br>0.6416 |
|      | DHF 10<br>mg/kg | 1.743 | 0.5325 | 0.5153,<br>2.971 |        |                             |

Supplementary Figure S2

|           |              | Mean   | S. E. M | C. I              | P      | Adjusted P value            |
|-----------|--------------|--------|---------|-------------------|--------|-----------------------------|
| pPLC      | naive        | 1      | 0.3379  | 0.06194,<br>1.938 | 0.0396 | naive vs. 5mg/Kg<br>0.0297  |
|           | Pilo 7 days  | 3.967  | 0.9354  | 1.370, 6.564      |        | naive vs. 10mg/Kg<br>0.5830 |
|           | Pilo 21 days | 2.280  | 0.6387  | -0.4683,<br>5.028 |        |                             |
| pERK      | naive        | 1      | 0.2789  | 0.2257,<br>1.774  | 0.0511 | naive vs. 5mg/Kg<br>0.0452  |
|           | Pilo 7 days  | 2.316  | 0.5071  | 0.9079,<br>3.724  |        | naive vs. 10mg/Kg<br>0.5776 |
|           | Pilo 21 days | 1.662  | 0.2547  | -1.573,<br>4.898  |        |                             |
| pAKT      | naive        | 1      | 0.4148  | -0.1517,<br>2.152 | 0.0033 | naive vs. 5mg/Kg<br>0.0237  |
|           | Pilo 7 days  | 4.317  | 0.5164  | 2.883, 5.751      |        | naive vs. 10mg/Kg<br>0.0277 |
|           | Pilo 21 days | 4.765  | 0.8275  | 1.205, 8.326      |        |                             |
| Y515 TrkB | naive        | 1      | 0.08593 | 0.7614,<br>1.239  | 0.0010 | naive vs. 5mg/Kg<br>0.0460  |
|           | Pilo 7 days  | 2.512  | 0.3813  | 1.454, 3.571      |        | naive vs. 10mg/Kg<br>0.7975 |
|           | Pilo 21 days | 0.8244 | 0.1075  | 0.3621,<br>1.287  |        |                             |
| Y816 TrkB | naive        | 1      | 0.09904 | 0.7250,<br>1.275  | 0.0149 | naive vs. 5mg/Kg<br>0.0237  |
|           | Pilo 7 days  | 2.407  | 0.4324  | 1.207, 3.608      |        | naive vs. 10mg/Kg<br>0.1281 |
|           | Pilo 21 days | 2.042  | 0.2190  | 1.100, 2.984      |        |                             |

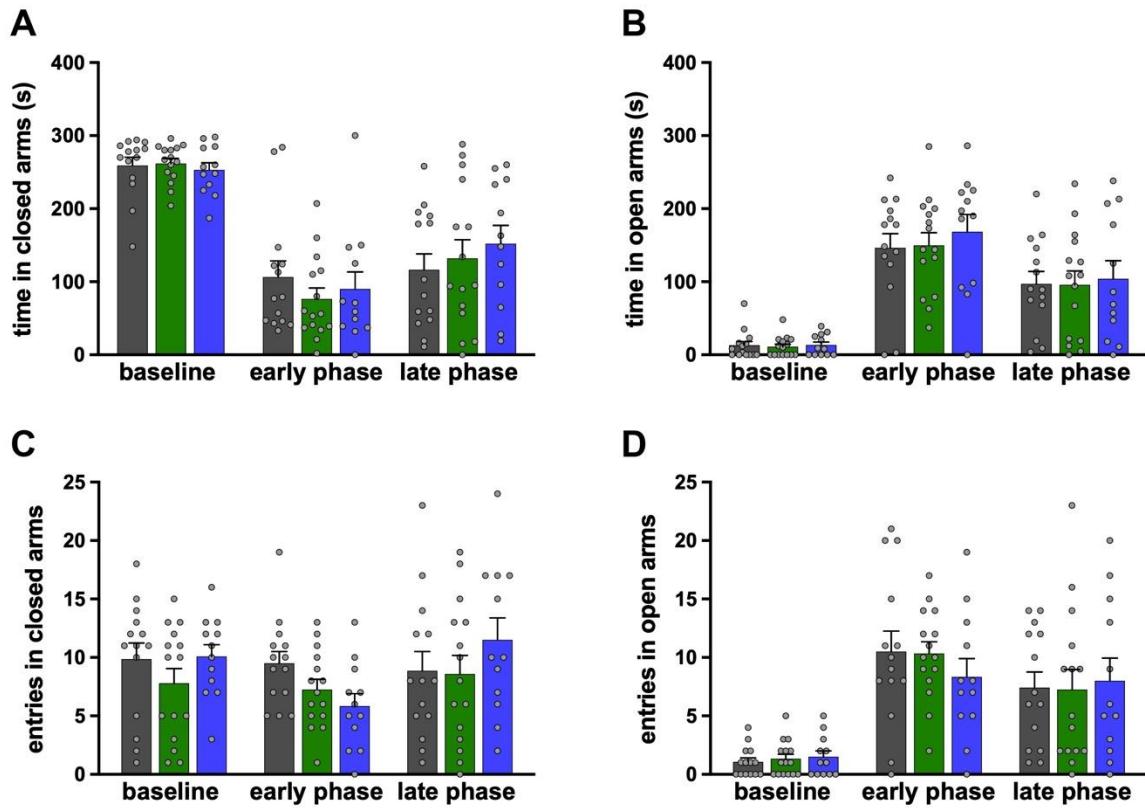

**Supplementary Figure 1.** Elevated plus maze (EPM) test, performed before SE (baseline), 8 days (early phase) or 21 days (late phase) after SE. **(A)** Time spent in closed arms. **(B)** Time spent in open arms. **(C)** Number of entries in closed arms. **(D)** Number of entries in open arms. Bars represent the mean  $\pm$  SEM and gray dots represent data from individual animals. Vehicle-treated animals are represented in gray, 7,8-DHF 5 mg/kg (DHF 5) in green, 7,8-DHF 10 mg/kg (DHF 10) in blue.

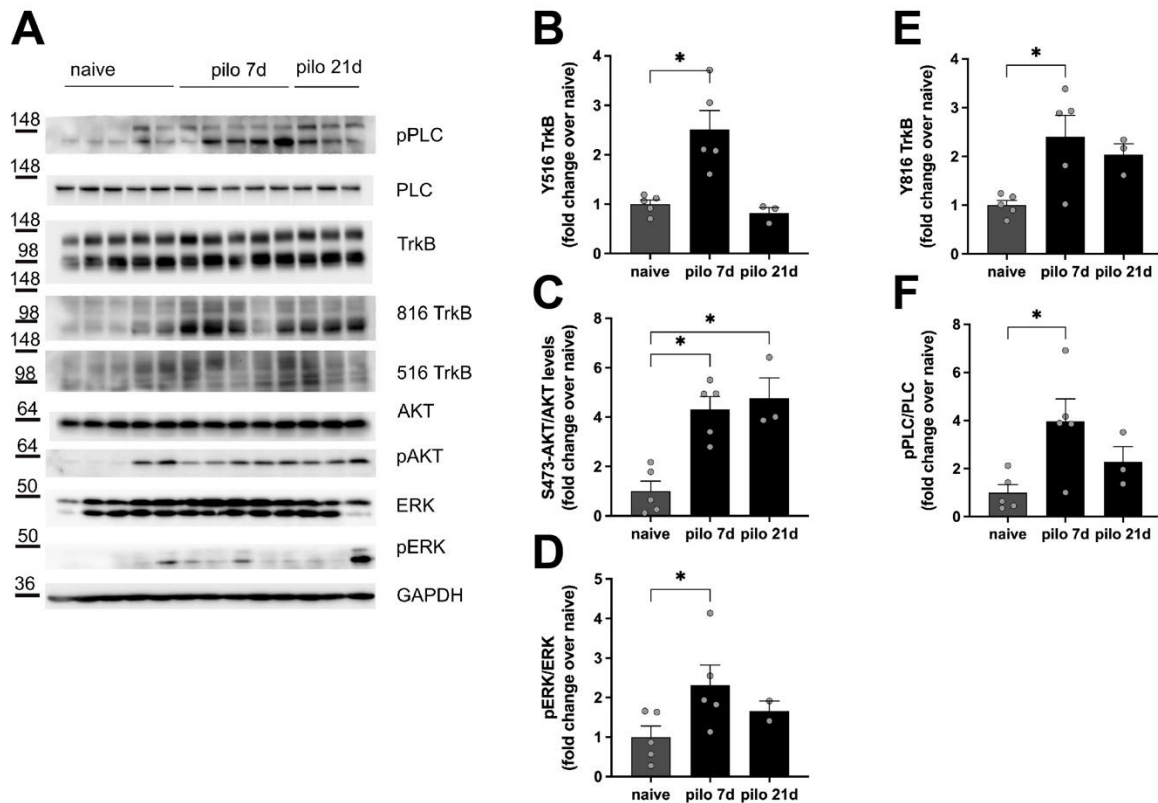

**Supplementary Figure 2. Phosphorylation of TrkB, AKT, ERK and PLC $\gamma$  proteins in the hippocampi of lithium-pilocarpine (pilo) rats.** (A) Representative western blot of the indicated proteins in extracts from hippocampi. (B-F) Quantification of Y516 TrkB (B), S473-AKT (C), ERK (D), Y816 TrkB (E) and Y783-PLC $\gamma$  (F) phosphorylation. Protein levels are shown as fold change over naïve (vehicle-treated rats). Levels of phosphorylated proteins are normalized against the corresponding total protein, then for loading (GAPDH). Naïve: n=5; pilo 7 days: n=5; pilo 21 days; n=3. \* p<0.05, Kruskal-Wallis one-way ANOVA and *post-hoc* Dunn's test.
